# Supplementary figures and images for: Theoretical study of polyiodide formation and stability on monolayer and bilayer graphene
Source: Royal Society of Chemistry journal article supplement (doi:10.1039/c5cp04594k), 2015-01-01

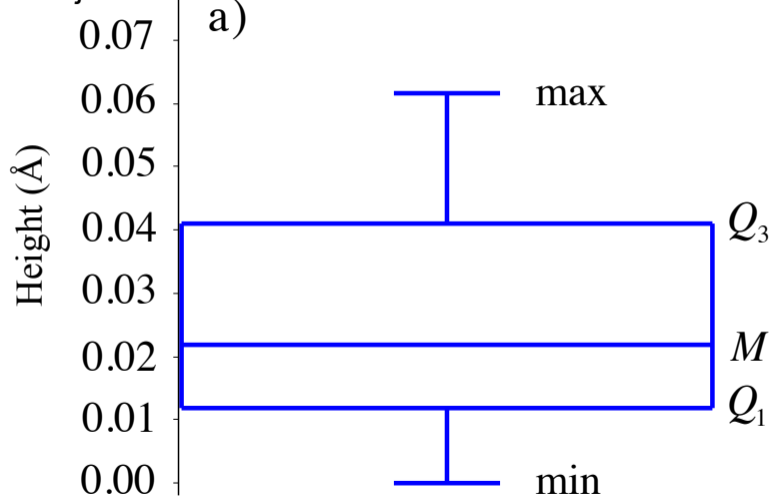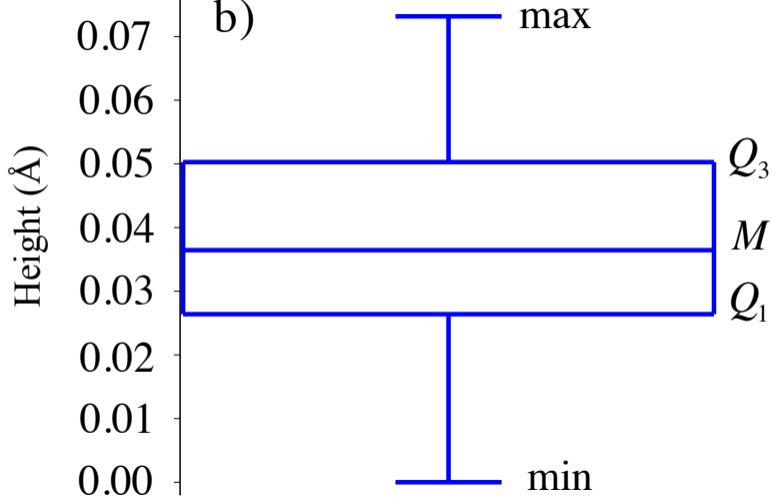

Supplement: c5cp04594k1.pdf [file c5cp04594k1.pdf]

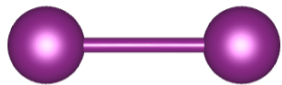

(a)

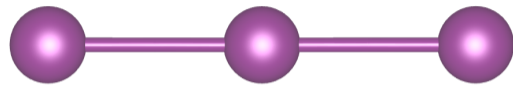

(b)

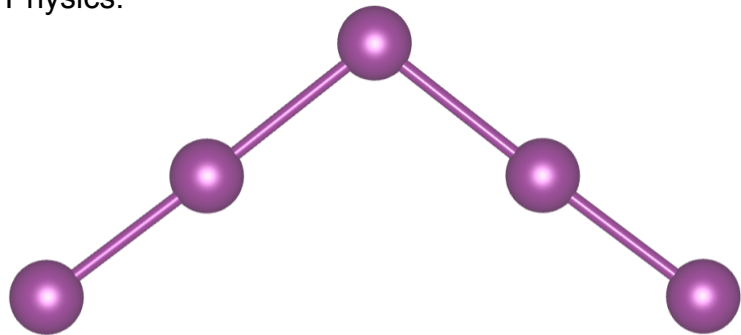

(c)

Supplement: c5cp04594k2.pdf [file c5cp04594k2.pdf]
